1 **Comparing statistical and mechanistic models to identify the drivers of**  
2 **mortality within a rear-edge beech population**

3

4 **Authors:**

5 Cathleen Petit-Cailleux<sup>1</sup>, Hendrik Davi<sup>1</sup>, François Lefèvre<sup>1</sup>, Joseph Garrigue<sup>2</sup>, Jean-André Magdalou<sup>2</sup>,  
6 Christophe Hurson<sup>2,3</sup>, Elodie Magnanou<sup>2,4</sup>, and Sylvie Oddou-Muratorio<sup>1</sup>.

7

8 **Adresses**

9 <sup>1</sup>INRAE, URFM, Avignon, France

10 <sup>2</sup>Réserve Naturelle Nationale de la Forêt de la Massane, France

11 <sup>3</sup>Fédération des Réserves Naturelles Catalanes, Prades, France

12 <sup>4</sup>Sorbonne Université, CNRS, Biologie Intégrative des Organismes Marins, BIOM, F-66650 Banyuls-  
13 sur-Mer, France

14

15 **Keywords:** *Fagus sylvatica* L., logistic regression, process-based model, dynamic vegetation model,  
16 CASTANEA, longitudinal analysis, defoliation.

17

18

19

20

21

22

23

24

25

26

27

28

29

30

31

32 **Abstract**

33         Since several studies have been reporting an increase in the decline of forests, a major issue  
34 in ecology is to better understand and predict tree mortality. The interactions between the different  
35 factors and the physiological processes giving rise tree mortality, as well as the inter-individual  
36 variability in mortality risk, still need to be better assessed.

37         This study investigates mortality in a rear-edge population of European beech (*Fagus sylvatica*  
38 L.) using a combination of statistical and process-based modelling approaches. Based on a survey of  
39 4323 adult beeches since 2002 within a natural reserve, we first used statistical models to quantify  
40 the effects of competition, tree growth, size, defoliation and fungi presence on mortality. Secondly,  
41 we used an ecophysiological process-based model (PBM) to separate out the different mechanisms  
42 giving rise to temporal and inter-individual variations in mortality by simulating depletion of carbon  
43 stocks, loss of hydraulic conductance and damage due to late frosts in response to climate.

44         The combination of all these simulated processes was associated with the temporal variations  
45 in the population mortality rate. The individual probability of mortality decreased with increasing  
46 mean growth, and increased with increasing crown defoliation, earliness of budburst, fungi  
47 presence and increasing competition, in the statistical model. Moreover, the interaction between  
48 tree size and defoliation was significant, indicating a stronger increase in mortality associated to  
49 defoliation in smaller than larger trees. Finally, the PBM predicted a higher conductance loss  
50 together with a higher level of carbon reserves for trees with earlier budburst, while the ability to  
51 defoliate the crown was found to limit the impact of hydraulic stress at the expense of the  
52 accumulation of carbon reserves.

53         We discuss the convergences and divergences obtained between statistical and process-based  
54 approaches and we highlight the importance of combining them to characterize the different  
55 processes underlying mortality, and the factors modulating individual vulnerability to mortality.

56

57

## 58 **Introduction**

59 Global changes have been repeatedly reported to be the cause of forest decline and tree  
60 mortality, both in terms of background, non-catastrophic mortality (Van Mantgem et al. 2009,  
61 Lorenz and Becher 2012) and of massive, catastrophic mortality due to extreme, ‘pulse’ events  
62 (Allen et al. 2010; Lorenz and Becher 2012; Mueller et al. 2005). To predict how such a new regime  
63 of trees mortality will impact upon forest structure, composition and ecosystem services (Anderegg  
64 et al. 2015a; Choat et al. 2018), we need to better understand the respective roles of the various  
65 drivers and mechanisms underlying tree mortality.

66 Studying mortality poses several challenges, in particular because it is triggered by several  
67 factors and involves several interacting physiological processes. The factors triggering mortality  
68 include extreme, pulse climatic events (i.e. drought, storms, floods, heavy snow, late frosts,  
69 wildfires) or sudden changes in biotic interactions (i.e. emerging pests, invasive species), but also  
70 long-term climatic or biotic perturbations (i.e. recurrent water deficits, changes in competition at  
71 the community level) (Maraun et al. 2003; McDowell et al. 2011). Moreover, these factors can have  
72 interactive effects. For instance, drought may increase trees’ vulnerability to pests (Durand-  
73 Gillmann et al. 2014; Anderegg et al. 2015b) or predispose them to wildfires (Brando et al. 2014).  
74 Finally, a single factor triggering mortality may involve several underlying physiological processes,  
75 with several thresholds leading to mortality and potential feedback between them (McDowell et al.  
76 2011). This is exemplified by drought, which is usually considered to trigger mortality through the  
77 combination of hydraulic failure and carbon starvation (Adams et al. 2017; Anderegg et al. 2012;  
78 McDowell et al. 2011).

79 Another challenge when studying mortality is that the physiological processes governing tree  
80 vulnerability may vary in space and time. For instance, vulnerability may vary among individual trees  
81 within a population according to (i) the spatial heterogeneity in available resources, especially soil  
82 water (Nourtier et al. 2014); (ii) the heterogeneity in an individual tree’s life history, and in particular  
83 the effects of past stresses on tree morphology and anatomy (Vanoni et al. 2016); (iii) the inter-  
84 individual variation of physiological responses to stresses, which depends on ontogenic, plastic, and  
85 genetic effects controlling the expression of traits (Anderegg 2015a; Vitasse et al. 2009).  
86 Vulnerability may also vary through time for a given individual/population, not only because of  
87 temporal climatic variation but also through inter-individual variations in phenological processes.  
88 This is well illustrated by the risk of late frost damage, which is closely related to the coincidence

89 between temporal patterns of budburst phenology, and the climatic sequence of low temperatures.  
90 Although relatively large safety margins were found regarding the risk of late frost damage during  
91 budburst across many European temperate tree (Bigler and Bugmann 2018), these safety margins  
92 may reduce with climate change, due to earlier budburst (Augspurger 2009). When young leaves  
93 have been damaged, some species can reflush, i.e. produce another cohort of leaves (Augspurger  
94 2009; Menzel, Helm, and Zang 2015), but the time required to reflush may reduce the length of the  
95 growing season (Lenz et al. 2013), and may lead to mortality if trees do not have enough reserves  
96 to do this.

97 Available approaches to investigate the multiple drivers and processes underlying tree  
98 mortality can be classified into two broad categories: statistical, observational approaches versus  
99 process-based, mechanistic approaches. Statistical approaches use forest inventory data to test  
100 which tree characteristics (e.g. related to tree size and growth rate, biotic and abiotic environment,  
101 including management) affect mortality. By comparing species or populations over areas with large  
102 climatic variations, such studies have demonstrated the overall effect of drought severity on  
103 mortality, although usually explaining only a limited proportion of the inter-annual variance  
104 observed in mortality rate (Allen et al. 2010; Greenwood et al. 2017). Moreover, probabilities of  
105 mortality have been predicted with a higher accuracy when individual covariates for tree growth,  
106 size and/or competition were included in the statistical models, highlighting the importance of inter-  
107 individual variability in the threshold for mortality (Hülsmann, Bugmann, and Brang 2017; Monserud  
108 1976). Recent statistical studies have attempted to include functional traits involved in the response  
109 to stress as additional covariates to improve the accuracy of mortality prediction, such as defoliation  
110 (Carnicer et al. 2011) or hydraulic safety margins (Benito-Garzón et al. 2018). Overall, the main  
111 advantage of statistical approaches is their ability to account for a potentially high number of factors  
112 and processes triggering mortality and for inter-individual variability in the threshold for mortality.  
113 However, these statistical models barely deal with the usually low temporal resolution of mortality  
114 data, missing information on the cause of tree death, and non-randomization inherent to natural  
115 population designs. In addition, the accuracy of statistical predictions can decrease outside the  
116 studied area (Hülsmann, Bugmann, and Brang 2017).

117 On the other hand, biophysical and ecophysiological process-based models (PBMs), initially  
118 developed to simulate carbon and water fluxes in forest ecosystems, are also useful to investigate  
119 the environmental drivers and physiological processes triggering tree mortality. For example, using

120 the PBM CASTANEA, Davi & Cailleret (2017) showed that mortality of silver fir in southern France  
 121 resulted from the combination of drought-related carbon depletion and pest attacks. Using six  
 122 different PBMs, Mc Dowell et al. (2013) found that mortality depended more on the duration of  
 123 hydraulic stress than on a specific physiological threshold. A main advantage of PBMs is their ability  
 124 to understand how physiological processes drive mortality and to predict mortality under new  
 125 combinations of forcing variables in a changing environment. However, they need a large number  
 126 of parameters to be calibrated. Most often, calibration is made using the average parameters'  
 127 values known at species level, and therefore does not account for possible inter-individual variability  
 128 of ecophysiological processes (Berzaghi et al. 2019). Moreover, biophysical and ecophysiological  
 129 PBMs generally do not take into account individual tree characteristics (i.e. related to ontogenic,  
 130 plastic and/or genetic variation). Hence, statistical and process-based approaches appear as  
 131 complementary, and many authors have called for studies comparing or combining them (Hawkes  
 132 2000; O'Brien et al. 2017; Seidl et al. 2011).

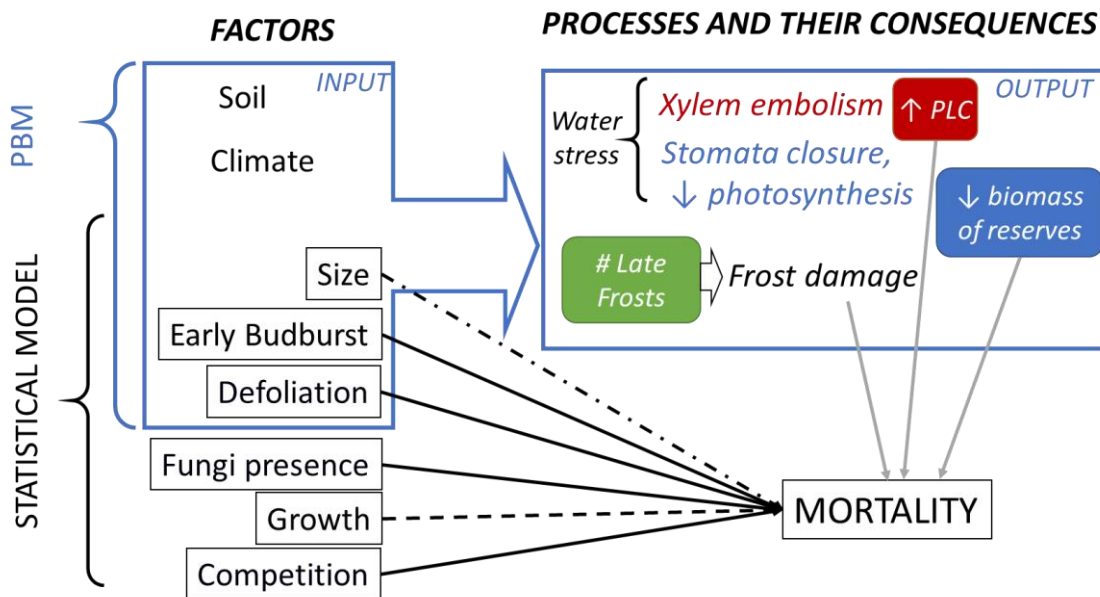

133

134 **Figure 1: Combining process-based and statistical models to study variables and processes**  
 135 **involved in tree mortality.** The square boxes indicate the measured factors and response variables  
 136 considered in statistical models. Boxes with rounded corners indicate stress-related output variables  
 137 simulated with the PBM CASTANEA. The blue box on the left delineates the input variables of  
 138 CASTANEA. At the top, grey arrows indicate the relationships considered to link stress-related  
 139 output variables simulated by CASTANEA with observed mortality rate in the studied population. At  
 140 the bottom, the black arrows indicate the relationships considered in the statistical model for the  
 141 probability of mortality at individual level (solid lines: expected positive effect; dashed lines:  
 142 expected negative effect; non-linear effects were expected for size). Moreover, the effects of size,  
 143 early budburst and defoliation on the individual probability of mortality were also investigated using  
 144 the PBM. PLC – percentage loss of conductance.

145

146 In this study, we used both a statistical regression model and the PBM CASTANEA (Figure 1),  
147 to investigate the drivers of mortality within a population located at the warm and dry ecological  
148 margin for European beech (42° 28' 41" N, 3° 1' 26" E; Supplementary Figure S1). Mortality, decline  
149 (crown defoliation and fungi presence), size, growth, competition and budburst were characterised  
150 in a set of 4323 adult trees over a 15 year-period from 2002 to 2016. CASTANEA was used to simulate  
151 the number of late frost days, the percentage loss of conductance (PLC) and the biomass of carbon  
152 reserves in response to stress. Specifically, we addressed the following questions: (1) How do  
153 climatic factors and physiological processes drive temporal variation in the mortality rate? (2) How  
154 do factors varying at tree-level modulate the individual tree's probability of mortality? (3) How do  
155 physiological mechanisms modulate the vulnerability of individuals?

## 156 ***Materials and Methods***

157

### 158 **Study species**

159 The European beech (*Fagus sylvatica* L.) combines a widespread distribution (from northern Spain  
160 to southern Sweden and from England to Greece) and an expected high sensitivity to climate change  
161 (Cheaib et al. 2012; Kramer et al. 2010). Bioclimatic niche models predict a future reduction of this  
162 species at the rear edge of its range over the next few decades (Cheaib et al. 2012; Kramer et al.  
163 2010). Its growth is highly sensitive to droughts (Dittmar, Zech, and Elling 2003; Jump, Hunt, and  
164 Penuelas 2006; Knutzen et al. 2017), which increase defoliation (Penuelas and Boada 2003).  
165 However, the low mortality rate observed so far in beech has led some authors to propose that this  
166 species presents a higher heat stress tolerance and metabolic plasticity when compared to other  
167 tree species (García-Plazaola et al. 2008). This apparent paradox between a low mortality and a high  
168 sensitivity to climate makes beech an interesting model species to study.

### 169 **Study site**

170 La Massane is a forest of 336 ha located in the French eastern Pyrenees ranging from 600 to 1127  
171 m.a.s.l. Located in the south of the beech range, the forest is at the junction of Mediterranean and  
172 mountainous climates with a mean annual rainfall of 1260 mm (ranging from 440 to 2000 mm) and  
173 mean annual temperature of 11°C (with daily temperature ranging from -10°C to 35°C)  
174 (Supplementary Figure S2). No logging operations have been allowed since 1886 and the forest was  
175 classified as a reserve in 1974. European beech is the dominant tree in the canopy representing

176 about 68% of basal area of the forest. Beech is in mixture with downy oak (*Quercus pubescens* Willd),  
177 maple (*Acer opalus* Mill., *Acer campestre* L., *Acer monspessulanum* L.), and holly (*Ilex aquifolium* L.).  
178 A 10ha fenced plot has excluded grazing from livestock and large herbivores since 1956. All trees  
179 from this protected plot have been geo-referenced and individually monitored since 2002  
180 (Supplementary Figure S3).

181 We estimated the soil water capacity (SWCa) through soil texture, soil depth and percentage of  
182 coarse elements measured in two soil pits in the protected plot. Secondly, we estimated the mean  
183 Leaf Area Index (LAI) by using hemispherical photographs (Canon 5D with Sigma 8mm EXDG fisheye).  
184 We computed the LAI and clumping index following the methodology described by Davi et al. (2009).  
185 SWCa and LAI were measured at population level.

### 186 **Individual tree measurements**

187 This study is based on the characterisation of twelve variables in 4323 beech trees in the  
188 protected plot over the period from 2002 to 2016 (Table 1). Note that beech sometimes produces  
189 stump shoots resulting in multiple stems from a single position (coppice). Here about 10% of beechs  
190 occur in coppice, and each stem of all the coppices was individually monitored and subsequently  
191 referred as a “tree”.

192

193 **Table 1: Quantitative (a) and categorical variables (b) measured at individual level.** All the variables  
 194 were measured in 4323 trees, except for H<sub>2002</sub> (1199 trees). The “Cat” column indicates the category  
 195 (i.e. size, growth, competition, decline, phenology). The “YMeas.” column indicates the year of  
 196 measurement; note that all the variables were measured only once, so when two dates are given  
 197 they indicate the period over which the variable is computed.

198 (a)

| Code                     | Variable                                                                   | Cat     | YMeas.    | mean | min  | max   | unit                                 |
|--------------------------|----------------------------------------------------------------------------|---------|-----------|------|------|-------|--------------------------------------|
| DBH <sub>2002</sub>      | Diameter at breast height measured in 2002                                 | Size    | 2002      | 21.7 | 10.0 | 116.0 | cm                                   |
| DBH <sub>2012</sub>      | Diameter at breast height measured in 2012                                 | Size    | 2012      | 22.8 | 10.0 | 116.0 | cm                                   |
| MBAI                     | Mean basal area increment between 2002 and 2012.                           | Growth  | 2002-2012 | 4.7  | 0.0  | 95.0  | cm <sup>2</sup> . year <sup>-1</sup> |
| H <sub>2002</sub>        | Height measured in 2002                                                    | Size    | 2002      | 8.8  | 2.0  | 26.0  | m                                    |
| DEFw                     | Cumulated and weighted defoliation score                                   | Decline | 2003-2016 | 0.1  | 0.0  | 1.0   | -                                    |
| Nstem                    | Number of stems observed in the coppice                                    | Compet  | 2002      | 1.5  | 1.0  | 11.0  | -                                    |
| Compet <sub>intra</sub>  | Intra-specific competition index                                           | Compet  | 2002      | 2.7  | 0.0  | 11.4  | -                                    |
| Compet <sub>intra+</sub> | Intra-specific competition index accounting for within-coppice competition | Compet  | 2002      | 1.0  | 0.0  | 12.7  | -                                    |
| Compet <sub>tot</sub>    | Total competition index, accounting for within-coppice competition         | Compet  | 2002      | 4.6  | 0.1  | 20.0  | -                                    |

200

201 (b)

| Code     | Variable                                             | Cat       | YMeas.    | Level    | Number of trees |
|----------|------------------------------------------------------|-----------|-----------|----------|-----------------|
| Fungi    | Presence (1) or absence (0) of the saproxylic fungus | Decline   | 2003-2016 | 1:<br>0: | 414<br>3913     |
| Budburst | Early (1) or late (0) budburst                       | Phenology | 2002      | 1:<br>0: | 237<br>4090     |

202

203 Tree mortality was recorded every year from 2003 to 2016, based on two observations (in  
 204 autumn, based on defoliation and in spring, based on budburst). A tree was considered to have died  
 205 at year  $n$  when (1) budburst occurred in the spring of year  $n$  but (2) no leaves remained in the  
 206 autumn of year  $n$ , and (3) no budburst occurred in year  $n+1$ . All the 4323 trees were alive in year  
 207 2003 (Supplementary Figure S4). We computed the annual mortality rate ( $\tau_n$ ) for each year  $n$  as:

$$208 \quad \tau_n = \frac{N_{\text{dead},n}}{N_{\text{alive},n-1}} \text{ (Equation 1),}$$

209 where  $N_{\text{dead},n}$  (respectively  $N_{\text{alive},n}$ ) is the number of dead (respectively alive) trees in year  $n$ .

210 Diameter at breast height (DBH) was measured 1.30 m above ground level in 2002 and 2012.

211 As we focused on the drivers of mature tree mortality, only trees with DBH<sub>2002</sub> greater than 10 cm



212 were retained for analysis. Individual growth was measured by the mean increment in basal area  
213 (MBAI) between 2002 and 2012, estimated as:

214

$$215 \quad MBAI = (\pi(DBH_{2012} - DBH_{2002})^2/4)/NyearsAlive_i \quad (\text{Equation 2}),$$

216 where  $NyearsAlive_i$  is the number of years where individual  $i$  was observed being alive. Height  
217 in 2002 was estimated for a subset of 1199 trees.

218 A bimodal pattern in budburst phenology had been previously reported in La Massane  
219 (Gausson 1958; Perci du Sert 1982). Some trees were observed to systematically initiate budburst  
220 about two weeks before all the others. Here, the monitoring allowed budburst phenology to be  
221 surveyed as a binary categorical variable, distinguishing trees with early budburst from the others.

222 The presence of defoliated major branches was recorded each year between 2003 and 2016  
223 (except 2010) as a categorical measure (DEF = 1 for presence; DEF = 0 for absence). These annual  
224 measures were cumulated and weighted over the observation period for each individual in the  
225 following quantitative variable:

$$226 \quad DEFw_i = \frac{\sum_{j=1}^{NyearsAlive_i} DEF_j}{NyearsAlive_i} \quad (\text{Equation 3}),$$

227 Year 2010 was not included in  $NyearsAlive_i$ . DEFw integrates (without disentangling) the  
228 recurrence of defoliation and the ability to recover from defoliation. The presence of fructification  
229 of the saproxylic fungus *Oudemansiella mucida* (Schrad.) was recorded as a categorical measure  
230 (Fungi = 1 for presence; Fungi = 0 for absence). Given that once observed, the fructification persists  
231 throughout the subsequent years, we analysed it as a binary variable.

232 Competition around each focal beech stem was estimated by the number of stems in the  
233 coppice ( $Nstem$ ) as an indicator of within-coppice competition. We also computed competition  
234 indices accounting simultaneously for the diameter ( $DBH_{2002}$ ) and the distance ( $d_{ij}$ ) of each  
235 competitor  $j$  to the competed individual  $i$ , following Martin and Ek (1984):

$$236 \quad Compet_{i,dmax} = \frac{1}{DBH_{2002i}} \sum_{j=1}^{N_{compet}} DBH_{2002j} \exp \left[ \frac{-16d_{ij}}{DBH_{2002i} + DBH_{2002j}} \right] \quad (\text{Equation 4}),$$

237 where  $N_{compet}$  is the total number of competitors in a given radius  $dmax$  (in m) around each focal  
238 individual  $i$ . Only trees with  $DBH_{2002j} > DBH_{2002i}$  are considered as competitors. Such indices were  
239 shown to describe more accurately the competition than indices relying on diameter only (Stadt et  
240 al. 2007). We computed this competition index in three ways. The intra-specific competition index  
241  $Compet_{intra}$  only accounts for the competition of beech stems not belonging to the coppice of the

242 focal tree. The intra-specific competition index  $\text{Compet}_{\text{intra+}}$  accounts for all beech stems belonging,  
243 or not, to the coppice of the focal tree. The total competition index  $\text{Compet}_{\text{tot}}$  accounts for all stems  
244 and species. We considered that stems located less than 3 m away from the focal stem belonged to  
245 the same coppice. The three indices were first computed at all distances from 1 m (or 3 m for  
246  $\text{Compet}_{\text{intra}}$ ) to 50 m from the target tree, with 1 m steps. We retained  $d_{\text{max}} = 15$  m in subsequent  
247 analyses, because all indices plateaued beyond this threshold value, suggesting that in a radius  
248 greater than 15 m, the increasing number of competitors is compensated for by distance.

## 249 **Climate data**

250 Local climate has been daily monitored *in situ* since 1976 and 1960 for temperature and  
251 precipitation/mean relative humidity, respectively. In order to obtain a complete climatic series  
252 (from 1959 to 2016), we used the quantile mapping and anomaly method in the R package  
253 “meteoland” (De Caceres et al. 2018), considering the 8-km-resolution-SAFRAN reanalysis (Vidal et  
254 al. 2010) as reference.

255 From the corrected climate series, we derived the daily climatic input variables for CASTANEA,  
256 which are the minimum, mean and maximum temperatures (in °C), the precipitation (mm), the wind  
257 speed ( $\text{m}\cdot\text{s}^{-1}$ ), the mean relative humidity (%) and the global radiation ( $\text{MJ}\cdot\text{m}^{-2}$ ).

## 258 **Simulations with CASTANEA**

259 **Model overview:** CASTANEA is a PBM initially developed to simulate carbon and water fluxes in  
260 forest ecosystems with no spatial-explicit representation of trees (Dufrêne et al. 2005). A tree is  
261 abstracted as six functional elements: leaves, branches, stem, coarse roots, fine roots and reserves  
262 (corresponding to non-structural carbohydrates). The canopy is divided into five layers of leaves.  
263 Photosynthesis is half-hourly calculated for each canopy layer using the model of Farquhar et al.  
264 (1980), analytically coupled to the stomatal conductance model proposed by Ball et al. (1987).  
265 Maintenance respiration is calculated as proportional to the nitrogen content of the considered  
266 organs (Ryan 1991). Growth respiration is calculated from growth increment combined with a  
267 construction cost specific to the type of tissue (De Vries, Brunsting, and Van Laar 1974).  
268 Transpiration is hourly calculated using the Monteith (1965) equations. The dynamics of soil water  
269 content (SWCo; in mm) is calculated daily using a three-layer bucket model. Soil drought drives  
270 stomata closure via a linear decrease in the slope of the Ball et al. (1987) relationship, when relative  
271 SWCo is under 40% of field capacity (Granier, Biron, and Lemoine 2000; Sala and Tenhunen 1996).  
272 In the carbon allocation sub-model (Davi et al., 2009; Davi & Cailleret 2017), the allocation

273 coefficients between compartments (fine roots, coarse roots, wood, leaf and reserves) are  
274 calculated daily depending on the sink force and the phenological constraints. CASTANEA model was  
275 originally developed and validated at stand-scale for beech (Davi et al. 2005).

276 **Focal processes and output variables:** In this study, we focussed on three response variables  
277 simulated by CASTANEA: (1) the percentage loss of conductance (PLC) as an indicator of vulnerability  
278 to hydraulic failure; (2) the number of late frost days (NLF) as an indicator of vulnerability to frost  
279 damage; and (3) the biomass of reserves (BoR) as an indicator of vulnerability to carbon starvation.  
280 Note that we did not simulate mortality with CASTANEA because the thresholds in PLC, NLF and BoR  
281 triggering mortality are unknown. These variables were simulated using the CASTANEA version  
282 described in Davi and Cailleret (2017) with two major modifications. First, for budburst, we used the  
283 one-phase UniForc model, which describes the cumulative effect of forcing temperatures on bud  
284 development during the ecodormancy phase (Chuine, Cour, and Rousseau 1999; Gauzere et al.  
285 2017). We simulated damage due to late frosts (see details in Appendix 1) and considered that trees  
286 were able to reflush after late frosts. We calculated NLF as the sum of late frost days experienced  
287 after budburst initiation.

288 Second, we implemented a new option in CASTANEA to compute PLC following the formula of  
289 Pammenter and Willigen (1998):

$$290 \quad \text{PLC} = \frac{1}{1 + e^{\text{slope}(\Psi_{\text{leaf}} - \Psi_{P50})}} \quad (\text{Equation 5}),$$

291 with  $\Psi_{\text{leaf}}$  (MPa) the simulated midday leaf water potential,  $\Psi_{50}$  (MPa) the species-specific  
292 potential below which 50% of the vessels are embolized, and *slope* a constant fixed to 50.

293 The leaf water potential  $\Psi_{\text{leaf}}$  was calculated as:

$$294 \quad \Psi_{\text{leaf}}(t + 1) = \Psi_{\text{soil}}(t + 1) - \frac{\text{TR}}{3600} \times R_{\text{SoilToLeaves}} + \frac{\Psi_{\text{leaf}}(t)}{\Psi_{\text{soil}}(t + 1) + \text{TR} \times R_{\text{SoilToLeaves}}} \\ 295 \quad \times e^{\frac{\text{deltaT}}{R_{\text{SoilToLeaves}} \times \text{Cap}_{\text{SoilToLeaves}}}} \\ 296 \quad (\text{Equation 6}),$$

297 where the soil water potential ( $\Psi_{\text{soil}}$  MPa) was calculated from daily SWCo (Campbell 1974).  $\Psi_{\text{leaf}}$   
298 was calculated hourly (deltaT = 3600s) based on the sap flow (TR in  $\text{mmol.m}^{-2}.\text{leaf}^{-1}$ ) simulated  
299 following the soil-to-leaves hydraulic pathway model of Loustau et al. (1990). We used a single  
300 resistance ( $R_{\text{SoilToLeaves}}$  in  $\text{MPa.m}^2.\text{s}^1.\text{kg}^{-1}$ , following Campbell 1974) and a single capacitance  
301 ( $\text{Cap}_{\text{SoilToLeaves}}$  in  $\text{kg.m}^{-2}.\text{MPa}^{-1}$ ) along the pathway.  $R_{\text{SoilToLeaves}}$  was assessed using midday and predawn  
302 water potentials found in the literature.

303 We added a binary option in CASTANEA to simulate branch mortality and defoliation as a  
304 function of PLC. In our case, when defoliation capability was added to the simulation with the  
305 option, we traduced the loss of leaves by reducing the LAI of the simulated tree. If the PLC at year  $n$   
306 was  $>0$ , the LAI at year  $n$  was reduced by the PLC value for trees able to defoliate (option “Defoli-  
307 able”). Otherwise, PLC has no consequences on LAI (no defoliation possible).

308  
309 **Simulation design:** The aim of the first simulations was to investigate whether response variables  
310 simulated by CASTANEA correlated with patterns of observed mortality in the studied population.  
311 We simulated a population of 100 trees representing the variability in individual characteristics  
312 observed in La Massane in terms of height-diameter allometry, DBH, leaf area index and budburst  
313 phenology (Appendix 1). We also simulated a range of environmental conditions representing the  
314 observed variability in SWCa and tree density. We also used this first simulation to validate  
315 CASTANEA based on the correlation between simulated and observed ring width (Appendix 1).  
316 For this first simulation, the values of focal output variables (BoR, PLC and NLF) were averaged across  
317 the 100 trees. We also computed a cumulated vulnerability index (CVI) for each year  $n$  combining  
318 the simulated BoR, PLC and NLF as follows:

$$319 \quad \text{CVI}_n = \left( \frac{\text{PLC}_n}{\max(\text{PLC})} + \frac{\text{NLF}_n}{\max(\text{NLF})} \right) - \frac{\text{BoR}_n}{\max(\text{BoR})} \quad (\text{Equation 7}),$$

320 Note that each term is weighted by its maximal value across all years, so that the contribution of  
321 the three drivers to vulnerability is balanced. The possible range of CVI is [-1; 2].

322 The second set of simulations aimed at investigating the differences in physiological responses  
323 between individuals with different characteristics. We simulated eight individuals corresponding to  
324 a complete cross design with two size categories (5 and 40 cm in DBH), two budburst types (early  
325 and normal), and two defoliation levels (option “Defoli-able” activated or not).

### 326 **Statistical models of mortality to explore individual drivers of mortality**

327 We used logistic regression models to investigate how tree characteristics affect the individual  
328 probability of mortality ( $P_{\text{mortality}}$ ). This approach is appropriate for a binary response variable and a  
329 mixture of categorical and quantitative explanatory variables, which are not necessarily normally  
330 distributed (Hosmer and Lemeshow 2000). We considered the following four full logistic  
331 regression models, which differ for the competition variable (separated below by "OR"):

332

333  $P_{\text{mortality}} \sim [\text{DEFw} + \text{Fungi} + \text{Budburst} + \text{MBAI} + (\text{Nstem} \text{ OR } \text{Compet}_{\text{intra}} \text{ OR } \text{Compet}_{\text{intra}} \text{ OR}$   
334  $\text{Compet}_{\text{tot}})] \times (\text{DBH}_{2002} + \text{DBH}_{2002}^2)$  (Equation 8)

335

336 where the predictors defoliation (DEFw), growth (MBAI), size (DBH<sub>2002</sub>) and competition (Nstem or  
337 the Compet indices) were quantitative variables, and the presence of fungi (Fungi) and budburst  
338 phenology (Budburst) were categorical variables. We included both a linear and quadratic effect of  
339 DBH<sub>2002</sub> by specifying this effect as a polynomial of second degree. Interaction effects of the previous  
340 predictors with this polynomial were included.

341 All variables were scaled before fitting the models. To select the best model depending on the  
342 choice of competition variable, we first fitted the full model described by equation 8 with each  
343 competition variable successively (Appendix 3). Then, we used the R package “MuMin” to compare  
344 and select the most parsimonious model among the four studied, based on AIC (Bartoń 2020).. Once  
345 the best competition variable chosen, our objective was to understand factors related to mortality  
346 rather than to achieve the best prediction, so we kept all the variables as recommended by Heinze  
347 et al. (2018) and Lederer et al. (2019). Model validity was checked based on the leverage points (i.e.  
348 points having a greater weight than expected by chance) with the Cook's distance (Cook distance <  
349 0.5 indicate no leverage). We evaluated the goodness-of-fit with the Brier test score (Brier 1950).  
350 We evaluated the sensitivity and specificity of the model using the receiver operating characteristic  
351 (ROC) curve.

352 Collinearity resulting from correlations between predictor variables is expected to affect the  
353 statistical significance of correlated variables by increasing type II errors (Schielzeth 2010). To  
354 evaluate this risk, we first checked for correlation among predictors included in equation 9 (Figure  
355 S5). We also computed the variation inflation factor (VIF) with the R package “car”. A threshold of  
356 the generalized VIF (GVIF) < 2 is commonly accepted to show that variables are not excessively  
357 correlated and do not make the model unstable.

358 We expressed the results in terms of odds ratios, indicating the degree of dependency  
359 between variables. For instance, the odds ratio for mortality as a function of budburst characteristics  
360 (early vs normal) is:

361 
$$\text{OddsRatio}_{\text{Early.vs.Normal}} = \frac{\text{Odds}_{\text{Early}}}{\text{Odds}_{\text{Normal}}} \quad (\text{Equation 9}),$$

362

363 
$$\text{With Odds}_{\text{Early}} = \frac{P_{\text{mortality}}(\text{Early})}{1 - P_{\text{mortality}}(\text{Early})} \quad \text{and} \quad \text{Odds}_{\text{Normal}} = \frac{P_{\text{mortality}}(\text{Normal})}{1 - P_{\text{mortality}}(\text{Normal})}$$

364

365 We computed odds ratios with “questionr” the R package (Barnier, Briatte, and Larmarange 2018).

366 The interactions were visualized with the package “jtools” (Long 2018).

## 367 **Results**

### 368 **Temporal variations in population mortality rate in relation to physiological vulnerability** 369 **simulated with CASTANEA.**

370 We found a significant positive correlation between observed and simulated ring widths (p-  
371 value  $\ll 0.01$ ). Although CASTANEA tended to overestimate growth at the beginning of the  
372 simulated period, and simulated a decreasing trend in growth over time bigger than that in the  
373 observations. This is likely to be due to a bad estimation of population density prior to the  
374 monitoring period (see details in Appendix 1).

375 The cumulated mortality rate between 2004 and 2016 was 23% (Figure 2; Table S1). After 2004  
376 (2.6%), two peaks of high annual mortality were observed, in 2006-2007 (3.3% in 2006) and in 2010  
377 (2.9%). The lowest annual mortality rate was observed in 2008 (0.8%).

378 CASTANEA simulated inter-annual variations in the percent loss of conductance (PLC): the  
379 mean PLC value varied among years, from 10% in 2004 and 2005 to 31% in 2006 (Figure 2a). The  
380 mean simulated biomass of carbon reserves (BoR) varied among years, from 51 gC.m<sup>-2</sup> in 2006 to  
381 354 gC.m<sup>-2</sup> in 2011. Finally, the number of late frost days (NLF) varied among years, from 0.2 in 2016  
382 to 7.56 days in 2010 (Figure 2c). The variation in the cumulative vulnerability index (CVI) integrated  
383 these different responses (Figure 2d), showed a peak in 2006 (drought), in 2010 (late frost) and in  
384 2012 (combination of frost and drought).

385 None of the response variables simulated by CASTANEA (NLF, PLC, BoR) was alone significantly  
386 correlated to annual variation in mortality rate. However, a significant correlation was observed  
387 between CVI and the annual mortality rate ( $r = 0.58$ , p-value = 0.04). Hence, inter-annual variations  
388 in CVI were a good predictor of the mortality rate, except in year 2007. Besides the stress-related  
389 variables simulated with CASTANEA, we also investigated the effects of climatic variables on inter-  
390 annual variations in mortality rates using a beta-regression model (Appendix 2). We considered  
391 drought indices computed from climatic series, and this approach confirmed the effect of drought  
392 on mortality.

393 **Figure 2: Stress-related output variable simulated with CASTANEA from 2004 to 2016: (a)**  
394 **percentage loss of conductance (PLC); (b) biomass of reserves in gC.kg<sup>-1</sup> (BoR); (c) number of late**  
395 **frost days (NLF); (d) Cumulated vulnerability index (CVI) integrating a, b and c.** The black line is the  
396 mean of simulation, and the grey area represents the inter-individual variation from the 1<sup>st</sup> to the  
397 3<sup>rd</sup> quartile. The yellow line is the mortality rate observed in La Massane.  
398

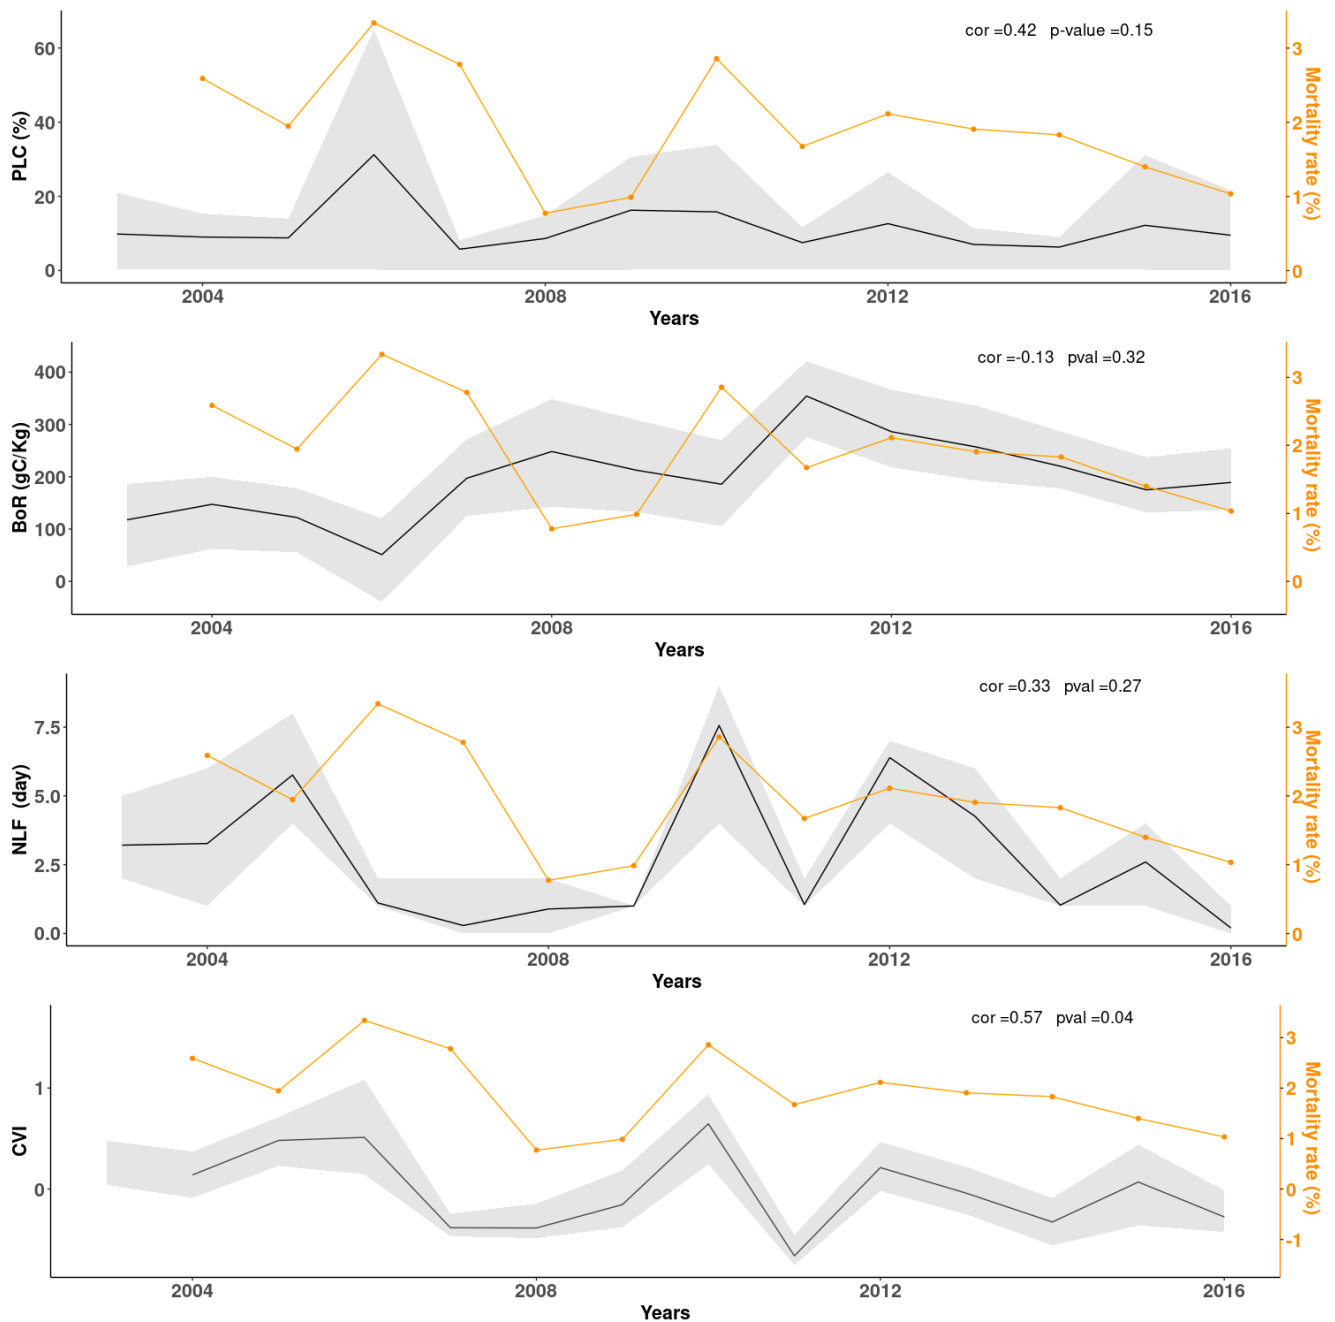

399

#### 400 **Inter-individual variation in vulnerability simulated with CASTANEA**

401 Simulations with CASTANEA showed that inter-individual differences in tree size, phenology,  
402 and defoliation, together with the intensity of climatic stress, affected the physiological responses  
403 to stress. The magnitude of the individual effects of each variable on tree vulnerability differed

404 during a drought year (2006), a frost year (2010) and a good year (2008, 2014 or 2016; Figure 3).  
405 The loss of conductance was higher for trees with early budburst and for larger trees, but this effect  
406 was only evident in drought years (Figure 3a). Moreover, during drought, the ability to defoliate  
407 decreased the risk of cavitation (Figure 3a) but increased the risk of carbon starvation (Figure 3b).  
408 By contrast, phenology only poorly affected the biomass of reserve (BoR): even during a frost year,  
409 trees with earlier budburst did not reduce their BoR, due to their ability to reflush (Figure 3b). BoR  
410 was always lower for large tree, even without stress (Figure 3b). This was expected, because there  
411 is no explicit competition for light in CASTANEA. Hence large trees and small trees have a relatively  
412 similar photosynthesis when it is scaled by soil surface (large trees photosynthesise slightly more  
413 because they have a stronger LAI). Large trees, on the other hand, have a larger living biomass and  
414 thus a higher level of respiration, which leads to lower reserves (Table S2).  
415  
416



417 **Figure 3: Physiological proxies of vulnerability simulated for eight trees differing in size,**  
418 **defoliation and budburst phenology.** We focus on three key years: 2006 (drought); 2008 (no stress);  
419 2010 (late frosts). Colours indicate the DBH at the beginning of the simulation: 5 cm (light blue)  
420 versus 40 cm (dark green). Triangles (respectively round) indicate individuals with early (respectively  
421 “normal”) budburst. Empty (respectively full) indicate individuals able (respectively not able)  
422 to defoliate. PLC: percentage of loss conductance; BoR: biomass of reserves.  
423

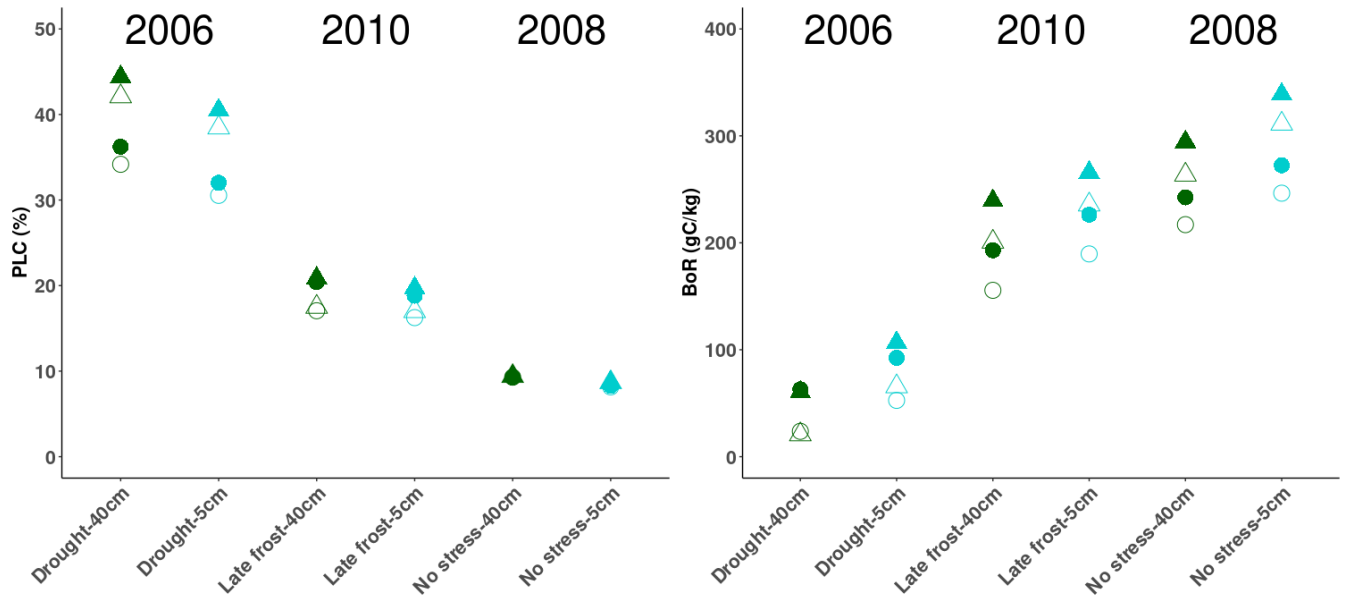

424  
425

426 **Figure 4: Interaction effects in the logistic regression model for individual mortality rates** (a)  
427 between diameter (DBH<sub>2002</sub>) and weighted defoliation (DEFw). (b) between DBH<sub>2002</sub> and the mean  
428 growth in basal area (MBAI). Regression lines are plotted for three values of DBH<sub>2002</sub>, corresponding  
429 to  $\pm 1$  standard deviation (10.7 cm) from the mean (22 cm). Confidence intervals at 95% are shown  
430 around each regression line.

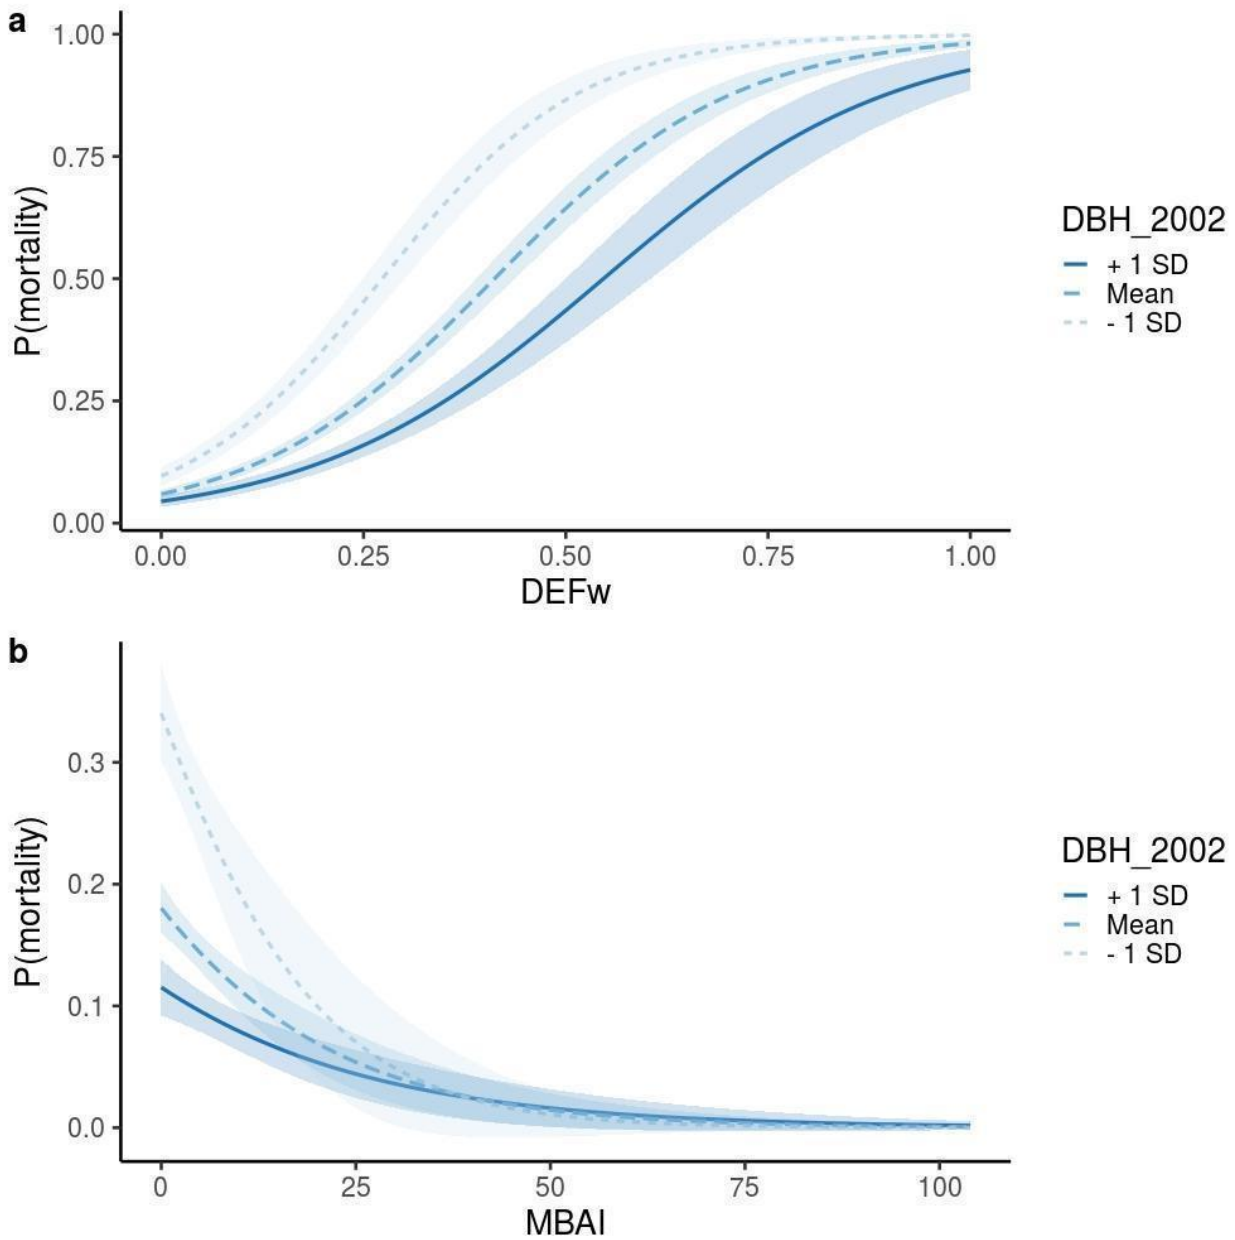

431

432

433

434 **Inter-individual variation in the probability of mortality**

435 Among the four models tested, the more parsimonious one was the one with the variable of  
 436 competition  $N_{stem}$ . All the variables listed in equation 8 had significant main effects on the  
 437 probability of mortality, except DBH in its linear form (Table 2). This model explained 49% of the  
 438 observed mortality and had both a good validity and goodness-of-fit (Appendix 3). However, the  
 439  $GVIF^{1/2df}$  score for DBH was superior to 2 meaning that the collinearity with other variables was high,  
 440 which we interpret as a consequence of the high number of interactions tested and not significant.  
 441 Defoliation had the strongest linear effect on mortality: the relative probability of mortality  
 442 increased by 1020 times for a one-unit increase in DEFw. Then, the relative probability of mortality  
 443 was 2.26 higher for trees with earlier budburst as compared to others, and 1.88 higher for trees  
 444 bearing fungi fructifications as compared to others. The relative probability of mortality increased  
 445 with increasing  $N_{stem}$ , and decreased with increasing MBAI. Regarding the effect of tree size, the  
 446 polynomial of degree 2 corresponded to a U-shape and traduced a higher relative probability of  
 447 mortality for both the smaller and the larger trees (In addition, this calibration is based on the mean  
 448 of the individuals' 2, Appendix 3).

449  
 450 **Table 2: Effects of tree characteristics on the individual tree's probability of mortality.** Variables  
 451 are defined in Table 1. Effects were estimated with a logistic regression model (equation 8).  $\beta$  is the  
 452 maximum likelihood estimate, with its estimated error (SE), z-value, and associated p-value. OR is  
 453 the odds ratio.  
 454

| Variables                                 | $\beta$ | SE    | z value | p-value              | OR                    |
|-------------------------------------------|---------|-------|---------|----------------------|-----------------------|
| DEFw                                      | 6.93    | 0.26  | 26.30   | <0.0001              | $1.02 \cdot 10^3$     |
| Fungi                                     | 0.63    | 0.16  | 3.96    | <0.0001              | 1.88                  |
| Budburst                                  | 0.82    | 0.17  | 4.71    | <0.0001              | 2.26                  |
| MBAI                                      | -0.45   | 0.08  | -5.58   | <0.0001              | 0.64                  |
| Nstem                                     | 0.13    | 0.04  | 3.44    | <0.0001              | 1.14                  |
| DBH <sub>2002</sub>                       | -9.19   | 8.16  | -1.13   | 0.26                 | $1.02 \cdot 10^{-4}$  |
| DBH <sub>2002</sub> <sup>2</sup>          | 21.32   | 9.32  | 2.29    | 0.02                 | $1.81 \cdot 10^9$     |
| DEFw:DBH <sub>2002</sub>                  | -49.71  | 15.51 | -3.20   | $5.91 \cdot 10^{-4}$ | $2.57 \cdot 10^{-22}$ |
| DEFw:DBH <sub>2002</sub> <sup>2</sup>     | 32.97   | 17.08 | 1.93    | 0.05                 | $2.08 \cdot 10^{14}$  |
| Fungi:DBH <sub>2002</sub>                 | -11.33  | 8.69  | -1.30   | 0.19                 | $1.21 \cdot 10^{-5}$  |
| Fungi:DBH <sub>2002</sub> <sup>2</sup>    | -0.44   | 8.51  | -0.05   | 0.96                 | 0.65                  |
| Budburst:DBH <sub>2002</sub>              | 0.27    | 10.41 | 0.03    | 0.98                 | 1.31                  |
| Budburst:DBH <sub>2002</sub> <sup>2</sup> | -3.11   | 12.19 | -0.26   | 0.80                 | $4.46 \cdot 10^{-2}$  |
| MBAI:DBH <sub>2002</sub>                  | 2.89    | 3.37  | 0.86    | 0.39                 | 18.10                 |
| MBAI:DBH <sub>2002</sub> <sup>2</sup>     | -6.18   | 3.34  | -1.85   | 0.06                 | $2.07 \cdot 10^{-3}$  |
| Nstem:DBH <sub>2002</sub>                 | 1.32    | 4.12  | 0.32    | 0.75                 | 3.76                  |
| Nstem:DBH <sub>2002</sub> <sup>2</sup>    | 0.00    | 4.88  | 0.00    | 1.00                 | 1.00                  |

455 Interaction effects between diameter and defoliation on mortality were significant: the  
 456 relative probability of mortality increased more rapidly with DEFw for small rather than larger trees,  
 457 and at an equal level of defoliation, the probability of mortality was always higher for smaller trees  
 458 (Figure 4a, Table 2). Interaction effects between  $DBH_{2002}^2$  and growth on mortality were also  
 459 significant: the decrease in the relative probability of mortality with increasing mean growth was  
 460 evident mostly for small trees (Figure 4b). These results were robust whatever the choice of the  
 461 competition variable ( $N_{stem}$  versus competition indices), or the choice of the size variable (height  
 462 instead of diameter) and the choice of considering size ( $DBH_{2002}$ ) as a quantitative or a categorical  
 463 variable (Appendix 3). Finally, we obtained similar results with an alternative approach (survival  
 464 analysis) which account simultaneously for both levels of variability (individual and temporal) in our  
 465 data set (Appendix 4).

466  
 467

468 **Table 3: Summary of the main effects of the studied variables on mortality.**  
 469 **NLF: number of late frost days; PLC= percentage of loss conductance; BoR: Biomass of reserve**

470

| <i>Temporal variations in the population mortality rate.</i>          |                                                                          |                                                                      |
|-----------------------------------------------------------------------|--------------------------------------------------------------------------|----------------------------------------------------------------------|
| Simulated variables                                                   | Related climate stress                                                   | Process-based model                                                  |
| NLF                                                                   | late frost                                                               | Not directly correlated with the observed mortality rate             |
| PLC                                                                   | drought                                                                  | Not directly correlated with the observed mortality rate             |
| BoR                                                                   | late frost and drought                                                   | Not directly correlated with the observed mortality rate             |
| CVI                                                                   | PLC + NLF - BoR                                                          | Positively correlated with the observed mortality rate               |
| <i>Inter-individual variations in tree's probability of mortality</i> |                                                                          |                                                                      |
| Variables                                                             | Statistical model                                                        | Process-based model                                                  |
| Crown defoliation                                                     | Associated to a strong increase in mortality, especially for small trees | Associated to a lower BoR but also to a lower PLC                    |
| Size (DBH)                                                            | The smallest and the largest trees had a higher mortality                | Large trees had always a lower BoR, and a higher PLC in drought year |
| Growth (MBAI)                                                         | Fast-growing trees had a lower mortality (evident only for small trees)  | Not tested                                                           |
| Budburst phenology                                                    | Tree with earlier budburst had a higher mortality                        | Tree with earlier budburst had a lower PLC in drought year           |
| Competition (Nstem)                                                   | Increasing competition was associated to a higher mortality              | Not tested                                                           |
| Presence of fungi                                                     | Tree with fungi had a higher mortality                                   | Not tested                                                           |

471

472

473 **Discussion**

474 By comparing statistical and process-based models, this study shed new light on the inter-  
475 annual and inter-individual variability of mortality in a drought- and frost-prone beech population.  
476 We showed that mortality in this marginal population is triggered by a combination of climatic  
477 factors, and that the vulnerability to drought and frost is modulated by several individual  
478 characteristics (defoliation, vegetative phenology, growth, size, competitors), as summarized in  
479 Table 3.

480 **The rate of mortality increased in response to drought and late frosts**

481 The annual mortality rates observed in this study ranged between 0.7 and 3.3% (mean value  
482 = 2%). This is at the upper range of the few mortality estimates available for beech. Hülsmann et al.  
483 (2016) reported annual mean rates of mortality of 1.4%, 0.7% and 1.5% in unmanaged forests of  
484 Switzerland, Germany and Ukraine, with a maximum mortality rate of 2.2%. Archambeau et al.  
485 (2019) estimated even lower mortality rates (mean annual value =  $3.8 \cdot 10^{-3}\%$ , range =  $3.7 \cdot 10^{-3}\%$  to  
486  $3.8 \cdot 10^{-3}\%$ ) from European forest inventory data (including managed and unmanaged forests).  
487 Overall, these mortality rates are low when compared to other tree species; for instance, according  
488 to the French national forest inventory, the average mortality is 0.1% for beech against 0.3% on  
489 average for other species and 0.4% for spruce or 0.2% for silver fir (IFN 2016). The relatively high  
490 value of natural mortality observed here may result from the absence of management (which  
491 resulted in high tree density), combined with the population location being at the dry, warm margin  
492 of species distribution (Figure S1), where most population extinctions are expected in Europe  
493 (Thuiller et al. 2005). However, we cannot rule out that the size threshold in inventories, which differ  
494 between studies, also affects these different mortality estimates (e.g., a higher frequency of smaller  
495 trees increases the mortality rate).

496 We showed that inter-annual variations in the observed mortality rate in our studied  
497 population were significantly associated with variations in the cumulative vulnerability index (CVI)  
498 integrating the number of late frost days (NLF), the percentage loss of conductance (PLC) and the  
499 biomass of carbon reserves (BoR) simulated by CASTANEA. We found no correlation when the three  
500 response variables simulated by CASTANEA were considered separately, highlighting that patterns  
501 of mortality in beech are driven by a combination of drought and late-frost stresses. In particular,  
502 simulations showed that in 2010 (a year without drought), the high mortality rate coincided with an  
503 extreme late frost event. This is consistent with the study of Vanoni et al (2016), which showed that

504 both drought and frost could contribute to beech mortality. Our results also support the emerging  
505 consensus that mortality at dry, warm margins is not due either to carbon starvation or hydraulic  
506 failure, but is rather the result of a balance of all these responses (e.g. McDowell et al. 2011; Sevanto  
507 et al. 2014).

508 In future developments, the CVI could be refined in several ways. Its different components  
509 could be weighted based on ecophysiological knowledge. The CVI could also benefit from taking into  
510 account the temporal dynamics of mortality, such as the existence of positive or negative post-  
511 effects across years. The number of years of observations in this study did not allow to account for  
512 these lagged effects, which probably explains why the CVI failed to predict the high mortality  
513 observed in 2007. Indeed, the high mortality in 2007 was probably due to the lagged effect of the  
514 2006 drought. Such lags between the weakening of a tree and its final death were shown for beech  
515 in Vanoni (2016) and silver fir in Davi & Cailleret (2017).

### 516 **The vulnerability to drought and frost varied among individuals**

517 The large number of trees individually monitored each year provided us with an exceptionally  
518 large sample size to test the inter-individual vulnerability to climatic hazards (drought and late frost)  
519 and to biotic pressures (competition and the presence of a fungus). Firstly, we found that a higher  
520 mean growth was associated with a lower probability of mortality, as previously demonstrated  
521 (Cailleret and Davi 2011; Gao et al. 2018). This decrease in mortality with increasing mean growth  
522 was evident mostly for small trees as already reported in beech seedlings (Collet and Le Moguedec  
523 2007) and other species (Kneeshaw et al. 2006; Lines, Coomes, and Purves 2010), but not in adult  
524 beech trees to our knowledge.

525 Secondly, we found that increased defoliation was associated with increased mortality. This  
526 result was expected from previous studies (Dobbertin and Brang 2001, Carnicer et al. 2011),  
527 although the consequences of defoliation are still being debated for beech. Senf et al. (2018)  
528 showed that defoliation was associated with tree decline, while Bauch et al., (1996) and Pretzsch  
529 (1996) found that the growth of highly defoliated beech trees did not decrease and could even  
530 increase in some cases. Our simulations comparing trees able, or not, to defoliate, shed light on the  
531 multiple effects of defoliation on mortality. These simulations showed that defoliation decreased  
532 carbon reserves in good years but could also limit the loss of hydraulic conductance during dry years.  
533 Furthermore, we observed a significant interaction between defoliation and tree size on mortality,  
534 showing that small trees were more vulnerable to mortality in response to defoliation than large

535 trees. However, we cannot rule out that this effect is due in part to the categorical method used to  
536 survey defoliation, which does not take into account the percentage of crown loss. Hence,  
537 defoliation may be biased with respect to size, such that small and defoliated trees will on average  
538 have a higher proportion of canopy loss, and therefore be more impacted than large and defoliated  
539 trees.

540 Thirdly, both statistical and process-based approaches found that trees with early budburst  
541 were more prone to die. By contrast, Robson et al. (2013) showed that trees with early budburst  
542 were not more vulnerable to mortality, but rather grew better, consistent with our simulations  
543 where trees with early budburst accumulate more reserves during good years. This discrepancy may  
544 be due to the location of our studied population at the rear-edge of beech distribution, where earlier  
545 budburst dates may expose trees to a higher risk of late frost. We can hypothesize that early  
546 budburst trees have been maintained in this population until now because they grow better in the  
547 "good" years, and therefore, are more likely to become dominant tree and have abundant  
548 reproduction. In CASTANEA simulations, the higher vulnerability of early trees resulted rather from  
549 a higher risk of hydraulic failure than from a higher impact of late frosts. This is because trees with  
550 early budburst have a longer vegetation season and they develop their canopies faster, which also  
551 increases their water needs due to the increase of transpiration. Altogether, the relationships  
552 between phenology and mortality deserve further investigation, especially since the spatio-  
553 temporal variation of budburst patterns under climate change may produce complex spatio-  
554 temporal patterns of stresses (Vanoni et al. 2016).

555 Regarding the effect of size, the results differed between the statistical approach, where large  
556 trees died less than small ones, and the simulations, which predicted a greater vulnerability to  
557 drought of large trees. There may be several explanations for this discrepancy. The first reason is  
558 that CASTANEA simulates an average tree without explicit competition for light and water; hence  
559 not accounting for the higher observed background mortality in small trees as compared to large  
560 ones. In addition, CASTANEA also does not account for individual dominance status, which can affect  
561 the current carbon balance of a tree and hence its capacity to mitigate stress. In the studied  
562 population, large trees are more likely to be dominant, with better access to light resources  
563 promoting carbon accumulation, as compared to small trees, which are more likely to be  
564 suppressed. Another reason is that tree size may vary with environmental factors in the studied  
565 population, such that large trees have a tendency to occur on better soils. Therefore, the size effect

566 observed through the statistical approach may reveal the confounding effect of spatial soil  
567 heterogeneity, not taken into account in the PBM. A measurement of water availability at individual  
568 tree level would be necessary to address this issue but was out of the scope of this study.

## 569 **Comparing statistical and process-based approaches allow to identify the causes of tree** 570 **vulnerability**

571 These two approaches illustrate the classical compromise between a fine understanding of  
572 physiological mechanisms driving mortality, with complex and expensive PBMs, versus efficient  
573 precision in local mortality predictions, with statistical models requiring less data, but having a  
574 weaker ability to generalize proximal causes. Most often, studies adopt either of the two  
575 approaches, and generally statistical approaches prevail (Hülsmann et al. 2016; Seidl et al. 2011).  
576 However, the two approaches are highly complementary, and combining them allows to decipher  
577 the respective roles of the drivers and mechanisms underlying tree mortality and to understand  
578 their variability among individuals or years (Hawkes 2000; O'Brien et al. 2017; Seidl et al. 2011). The  
579 two approaches can be compared at the individual level, as this study does, or they can be  
580 combined, as when we analysed the correlation between the observed mortality rate and simulated  
581 stress response variables. An upper level of integration would be inverse modelling, where observed  
582 mortality rates could be used to infer the physiological thresholds (e.g. in BoR, PLC and NLF) likely  
583 to trigger mortality (Davi & Cailleret 2017; Cailleret et al., 2020).

584 This study illustrated a classical difficulty in combining statistical and process-based  
585 approaches, related to the difference between observed variables and PBM parameters. For  
586 instance, the comparison of defoliated and non-defoliated trees does not have exactly the same  
587 meaning when using CASTANEA and the statistical approach. In CASTANEA, we compared trees, able  
588 versus unable to defoliate, while these average trees shared on average the same edaphic  
589 conditions. In the statistical approach, we compared trees with different levels of defoliation, but  
590 which also probably did not share the same edaphic and biotic conditions. Defoliation was thus also  
591 likely to be an indicator of the fertility of the environment, such that on shallow soils, defoliation  
592 was stronger and the probability of mortality increased. Hence, the correlation does not necessarily  
593 involve a causal relationship between defoliation and mortality.

594 The major benefit of our approach combining different approaches (statistical, process-based)  
595 at different scales (forest stand, individual) is to allow to relate the ecological patterns observed at  
596 an upper scale (forest stand, multi-year period) with the patterns observed at a lower scale where



597 processes operate (individual, year). This ability to aggregate/disaggregate patterns is  
598 acknowledged as a powerful approach to understand apparent contradictions between patterns  
599 observed at different scales (Clark et al. 2011). There are however some limitations to the  
600 approaches we used here. First, none of them could fully account for the non-independence of  
601 climatic effects on mortality between years. Indeed, the effect of climatic variables at a given year  
602 may depend on other variables expressed in previous years. This was observed in beech, where  
603 several drought years finally led to a growth decline (Jump et al. 2006; Knutzen et al. 2017; Vanoni  
604 et al. 2016) or a modification in sap flow (Hesse et al. 2019). Moreover, the processes driving  
605 mortality may change through time as the most sensitive individuals are progressively eliminated,  
606 and/or the surviving trees become less and less sensitive (i.e. acclimation Niinemets 2010). Finally,  
607 the statistical model at the individual level could not fully make use of the repeated measurements  
608 of mortality over the years, partly because other individual variables were measured only once over  
609 the study period (except defoliation). Survival analyses could unfortunately not fully address this  
610 limitation (Appendix 4), and the development of a finely tuned Bayesian approach was out of the  
611 scope of this study. Besides methodological improvements, another extension to the present study  
612 would be to combine statistical and process-based approaches at a larger spatial scale, among  
613 populations across climatic gradients. This would allow the investigation of whether the respective  
614 drought and late frost sensitivity differ between the rear, core and leading edge of species  
615 distribution, as suggested by Cavin and Jump (2017).

### 616 ***Data accessibility***

617 The data set analysed in this preprint is available online under the zenodo repository  
618 (<https://doi.org/10.5281/zenodo.3519315>). Raw data can be obtained from JG, JAM and CH.

### 619 ***Supplementary material***

620 The process-based model CASTANEA is an open-source software available on capsis website:  
621 <http://capsis.cirad.fr/>  
622 Supplementary materials (Figures and Tables) for this preprint are available on bioRxiv (XXX).

### 623 ***Author Contributions***

624 JAM, JG, CH and EM measured and mapped all the trees. CPC performed the wood core analyses.  
625 CPC, FL and SOM designed and ran the statistical models. CPC and HD ran the PBM. CPC drafted the  
626 manuscript, and all authors contributed to its improvement.

627 **Acknowledgments**

628 We are grateful to M. Cailleret, B. Fady, and N. Martin Saint Paul for discussions and comments on  
629 a previous version of this manuscript. We thank E. Walker and F. Bonneau for statistical discussions  
630 and advices, N. Mariotte for wood core sampling, and F. Guibal for their analyses. SOM and HD were  
631 funded by the EU ERA-NET BiodivERsA projects TIPTREE (BiodivERsA2-2012-15) and the ANR project  
632 MeCC (ANR-13-ADAP-0006). CP received funding from the European Union's Horizon 2020 research  
633 and innovation programme under grant agreement No. 676876 (GenTree).

634 **Conflict of interest disclosure**

635 The authors of this preprint declare that they have no financial conflict of interest with the content  
636 of this article. SOM is one of the PCI Ecology recommenders.

637 **References**

- 638 Adams, Henry D. et al. 2017. "A Multi-Species Synthesis of Physiological Mechanisms in Drought-  
639 Induced Tree Mortality." *Nature Ecology and Evolution* 1(9):1285–91.
- 640 Akaike, Hirotugu. 1987. "Factor Analysis and AIC." Pp. 371–86 in. Springer, New York, NY.
- 641 Allen, Craig D. et al. 2010. "A Global Overview of Drought and Heat-Induced Tree Mortality Reveals  
642 Emerging Climate Change Risks for Forests." *Forest Ecology and Management* 259(4):660–  
643 84.
- 644 Anderegg, W. R. L. et al. 2012. "From the Cover: The Roles of Hydraulic and Carbon Stress in a  
645 Widespread Climate-Induced Forest Die-Off." *Proceedings of the National Academy of  
646 Sciences* 109(1):233–37.
- 647 Anderegg, William R. L. 2015a. "Spatial and Temporal Variation in Plant Hydraulic Traits and Their  
648 Relevance for Climate Change Impacts on Vegetation." *New Phytologist* 205(3):1008–14.
- 649 Anderegg, William R. L. et al. 2015b. "Tree Mortality from Drought, Insects, and Their Interactions  
650 in a Changing Climate." *New Phytologist* 208(3):674–83.
- 651 Archambeau, Juliette et al. 2019. "Similar Patterns of Background Mortality across Europe Are  
652 Mostly Driven by Drought in European Beech and a Combination of Drought and  
653 Competition in Scots Pine." *Agricultural and Forest Meteorology*, 2020, vol. 280, p. 107772.
- 654 Arnold, Todd W. 2010. "Uninformative Parameters and Model Selection Using Akaike's  
655 Information Criterion." *Journal of Wildlife Management* 74(6):1175–78.
- 656 Augspurger, Carol K. 2009. "Spring 2007 Warmth and Frost: Phenology, Damage and Refoliation in  
657 a Temperate Deciduous Forest." *Functional Ecology* 23(6):1031–39.
- 658 Ball, J. Timothy, Ian E. Woodrow, and Joseph A. Berry. 1987. "A Model Predicting Stomatal  
659 Conductance and Its Contribution to the Control of Photosynthesis under Different  
660 Environmental Conditions." Pp. 221–24 in *Progress in photosynthesis research*. Springer.
- 661 Barnier, Julien, François Briatte, and Joseph Larmarange. 2018. "Questionr: Functions to Make  
662 Surveys Processing Easier."
- 663 Bartoń, Kamil. 2020. MuMIn: Multi-Model Inference. R package version 1.43.17. [https://CRAN.R-  
664 project.org/package=MuMIn](https://CRAN.R-project.org/package=MuMIn)
- 665 Bauch, Josef. 1986. "Characteristics and Response of Wood in Declining Trees from Forests  
666 Affected by Pollution." *IAWA Journal* 7(4):269–76.

- 667 Beguería, Santiago and Sergio M. Vicente-Serrano. 2017. "SPEI: Calculation of the Standardised  
668 Precipitation-Evapotranspiration Index."
- 669 Benito Garzón, Marta et al. 2018. "The Legacy of Water Deficit on Populations Having Experienced  
670 Negative Hydraulic Safety Margin." *Global Ecology and Biogeography* 27(3):346–56.
- 671 Berzaghi, F., Wright, I. J., Kramer, K., Oddou-Muratorio, S., Bohn, F. J., Reyer, C. P., ... & Hartig, F.  
672 2020. Towards a new generation of trait-flexible vegetation models. *Trends in Ecology &  
673 Evolution*, 35(3), 191-205.
- 674 Bigler, Christof and Harald Bugmann. 2018. "Climate-Induced Shifts in Leaf Unfolding and Frost  
675 Risk of European Trees and Shrubs." *Scientific Reports* 8(1):1–10.
- 676 Brando, Paulo Monteiro et al. 2014. "Abrupt Increases in Amazonian Tree Mortality Due to  
677 Drought-Fire Interactions." *Proceedings of the National Academy of Sciences of the United  
678 States of America* 111(17):6347–52.
- 679 Bréda, Nathalie, Roland Huc, André Granier, and Erwin Dreyer. 2006. "Temperate Forest Trees and  
680 Stands under Severe Drought : A Review of Ecophysiological Responses , Adaptation  
681 Processes and Long-Term Consequences." *Annals of Forest Science* 63(6):625–44.
- 682 Brier, Glenn W. 1950. "Verification of Forecasts Expressed in Terms of Probability." *Monthly  
683 Weather Review* 78(1):1–3.
- 684 De Caceres, Miquel, Nicolas Martin-StPaul, Marco Turco, Antoine Cabon, and Victor Granda. 2018.  
685 "Estimating Daily Meteorological Data and Downscaling Climate Models over Landscapes."  
686 *Environmental Modelling and Software* 186–96.
- 687 Cailleret, Maxime et al. 2017. "A Synthesis of Radial Growth Patterns Preceding Tree Mortality."  
688 *Global Change Biology* 23(4):1675–90.
- 689 Cailleret, Maxime and Hendrik Davi. 2011. "Effects of Climate on Diameter Growth of Co-Occurring  
690 *Fagus Sylvatica* and *Abies Alba* along an Altitudinal Gradient." *Trees* 25(2):265–76.
- 691 Cailleret, M., Bircher, N., Hartig, F., Hülsmann, L., & Bugmann, H. (2020). Bayesian calibration of a  
692 growth dependent tree mortality model to simulate the dynamics of European temperate -  
693 forests. *Ecological Applications*, 30(1), e02021
- 694 Campbell, Gaylon S. 1974. "A Simple Method for Determining Unsaturated Conductivity from  
695 Moisture Retention Data." *Soil Science* 117(6):311–14.
- 696 Carnicer, Jofre et al. 2011. "Widespread Crown Condition Decline, Food Web Disruption, and  
697 Amplified Tree Mortality with Increased Climate Change-Type Drought." *Proceedings of the  
698 National Academy of Sciences* 108(4):1474–78.
- 699 Cavin, Liam and Alistair S. Jump. 2017. "Highest Drought Sensitivity and Lowest Resistance to  
700 Growth Suppression Are Found in the Range Core of the Tree *Fagus Sylvatica* L. Not the  
701 Equatorial Range Edge." *Global Change Biology* 23(1):362–79.
- 702 Cheaib, Alissar et al. 2012. "Climate Change Impacts on Tree Ranges: Model Intercomparison  
703 Facilitates Understanding and Quantification of Uncertainty." *Ecology Letters* 15(6):533–44.
- 704 Choat, Brendan et al. 2018. "Triggers of Tree Mortality under Drought." *Nature* 558(7711):531–39.
- 705 Chuine, Isabelle, P. Cour, and D. D. Rousseau. 1999. "Selecting Models to Predict the Timing of  
706 Flowering of Temperate Trees: Implications for Tree Phenology Modelling." *Plant, Cell and  
707 Environment* 22(1):1–13.
- 708 Clark, James S. et al. 2011. "Individual-Scale Variation, Species-Scale Differences: Inference  
709 Needed to Understand Diversity." *Ecology Letters* 14(12):1273–87.
- 710 Collet, Catherine and Gilles Le Moguedec. 2007. "Individual Seedling Mortality as a Function of  
711 Size, Growth and Competition in Naturally Regenerated Beech Seedlings." *Forestry*  
712 80(4):359–70.

- 713 Cowan, I. R. and G. D. Farquhar. 1977. "Stomatal Function in Relation to Leaf Metabolism and  
714 Environment." *Symposia of the Society for Experimental Biology* 31:471–505.
- 715 Cribari-Neto, Francisco and Achim Zeileis. 2010. "Beta Regression in R." *Journal of Statistical*  
716 *Software* 34(2).
- 717 Davi, H. et al. 2005. "Modelling Carbon and Water Cycles in a Beech Forest. Part II.: Validation of  
718 the Main Processes from Organ to Stand Scale." *Ecological Modelling* 185(2–4):387–405.
- 719 Davi, H., C. Barbaroux, C. Francois, and E. Dufrêne. 2009. "The Fundamental Role of Reserves and  
720 Hydraulic Constraints in Predicting LAI and Carbon Allocation in Forests." *Agricultural and*  
721 *Forest Meteorology* 149(2):349–61.
- 722 Davi, Hendrik and Maxime Cailleret. 2017. "Assessing Drought-Driven Mortality Trees with  
723 Physiological Process-Based Models." *Agricultural and Forest Meteorology* 232:279–90.
- 724 Dittmar, Christoph, Wolfgang Zech, and Wolfram Elling. 2003. "Growth Variations of Common  
725 Beech (*Fagus Sylvatica* L.) under Different Climatic and Environmental Conditions in  
726 Europe—a Dendroecological Study." *Forest Ecology and Management* 173(1–3):63–78.
- 727 Dobbertin, Matthias and Peter Brang. 2001. "Crown Defoliation Improves Tree Mortality Models."  
728 *Forest Ecology and Management* 141(3):271–84.
- 729 Dufrêne et al. 2005. "Modelling Carbon and Water Cycles in a Beech Forest Part I : Model  
730 Description and Uncertainty Analysis on Modelled NEE." *Ecological Modelling* 185:407–36.
- 731 Durand-Gillmann, Marion, Maxime Cailleret, Thomas Boivin, Louis Michel Nageleisen, and Hendrik  
732 Davi. 2014. "Individual Vulnerability Factors of Silver Fir (*Abies Alba* Mill.) to Parasitism by  
733 Two Contrasting Biotic Agents: Mistletoe (*Viscum Album* L. Ssp. *Abietis*) and Bark Beetles  
734 (Coleoptera: Curculionidae: Scolytinae) during a Decline Process." *Annals of Forest Science*  
735 71(6):659–73.
- 736 Farquhar, G. D., S. von Caemmerer, and J. A. Berry. 1980. "A Biochemical Model of Photosynthetic  
737 CO<sub>2</sub> Assimilation in Leaves of C<sub>3</sub> Species." *Planta* 149(1):78–90.
- 738 Feng, Xue et al. 2018. "The Ecohydrological Context of Drought and Classification of Plant  
739 Responses." *Ecology Letters*, November 1, 1723–36.
- 740 Gao, Shan et al. 2018. "Dynamic Responses of Tree-Ring Growth to Multiple Dimensions of  
741 Drought." *Global Change Biology* 24(11):5380–90.
- 742 García-Plazaola, José Ignacio, Raquel Esteban, Koldobika Hormaetxe, Beatriz Fernández-Marín, and  
743 José María Becerril. 2008. "Photoprotective Responses of Mediterranean and Atlantic Trees  
744 to the Extreme Heat-Wave of Summer 2003 in Southwestern Europe." *Trees* 22(3):385–92.
- 745 Gausсен, H. 1958. "Le Hêtre Aux Pyrénées Espagnoles." Pp. 185–91 in *Actas del tercer congreso*  
746 *internacional de estudios pirenaicos*, Gerona.
- 747 Gauzere, J. et al. 2017. "Integrating Interactive Effects of Chilling and Photoperiod in Phenological  
748 Process-Based Models. A Case Study with Two European Tree Species: *Fagus Sylvatica* and  
749 *Quercus Petraea*." *Agricultural and Forest Meteorology* 244–245:9–20.
- 750 Gillner, Sten, Nadja Rüger, Andreas Roloff, and Uta Berger. 2013. "Low Relative Growth Rates  
751 Predict Future Mortality of Common Beech (*Fagus Sylvatica* L.)." *Forest Ecology and*  
752 *Management* 302:372–78.
- 753 Granier, A., P. Biron, and D. Lemoine. 2000. "Water Balance, Transpiration and Canopy  
754 Conductance in Two Beech Stands." *Agricultural and Forest Meteorology* 100(4):291–308.
- 755 Greenwood, Sarah et al. 2017. "Tree Mortality across Biomes Is Promoted by Drought Intensity,  
756 Lower Wood Density and Higher Specific Leaf Area" edited by J. Chave. *ECOLOGY LETTERS*  
757 20(4):539–53.
- 758 Heinze, Georg. Christine Wallisch et al., Variable selection – A review and recommendations for  
759 the practicing statistician. *Biometrical Journal* 60 (2018), S. 431-449

- 760 Hawkes, Corinna. 2000. "Woody Plant Mortality Algorithms: Description, Problems and Progress."  
761 *Ecological Modelling* 126(2–3):225–48.
- 762 Hesse, Benjamin D., Michael Goisser, Henrik Hartmann, and Thorsten E. E. Grams. 2019.  
763 "Repeated Summer Drought Delays Sugar Export from the Leaf and Impairs Phloem  
764 Transport in Mature Beech" edited by M. Dannoura. *Tree Physiology* 39(2):192–200.
- 765 Hijmans, Robert J., Steven Phillips, John Leathwick, Jane Elith, and Maintainer Robert J. Hijmans.  
766 2017. "Package 'Dismo.'" *Circles* 9(1):1–68.
- 767 Hosmer, David W. and Stanley Lemeshow. 2000. *Applied Logistic Regression*.
- 768 Hülsmann, Lisa et al. 2016. "Does One Model Fit All? Patterns of Beech Mortality in Natural Forests  
769 of Three European Regions." *Ecological Applications* 26(8):2463–77.
- 770 Hülsmann, Lisa, Harald Bugmann, and Peter Brang. 2017. "How to Predict Tree Death from  
771 Inventory Data – Lessons from a Systematic Assessment of European Tree Mortality Models -  
772 SUPP." *Canadian Journal of Forest Research (April):cjfr-2016-0224*.
- 773 Hülsmann, Lisa, Harald Bugmann, Maxime Cailleret, and Peter Brang. 2018. "How to Kill a Tree:  
774 Empirical Mortality Models for 18 Species and Their Performance in a Dynamic Forest  
775 Model." *Ecological Applications* 28(2):522–40.
- 776 IGN. 2016. *La Mortalité*. France. [https://inventaire-forestier.ign.fr/IMG/pdf/2018\\_mortalite.pdf](https://inventaire-forestier.ign.fr/IMG/pdf/2018_mortalite.pdf)
- 777 Jump, Alistair S., Jenny M. Hunt, and Josep Peñuelas. 2006. "Rapid Climate Change-Related  
778 Growth Decline at the Southern Range Edge of *Fagus Sylvatica*." *Global Change Biology*  
779 12(11):2163–74.
- 780 Kneeshaw, Daniel D., Richard K. Kobe, K. David Coates, and Christian Messier. 2006. "Sapling Size  
781 Influences Shade Tolerance Ranking among Southern Boreal Tree Species." *Journal of*  
782 *Ecology* 94(2):471–80.
- 783 Knutzen, Florian, Choimaa Dulamsuren, Ina Christin Meier, and Christoph Leuschner. 2017.  
784 "Recent Climate Warming-Related Growth Decline Impairs European Beech in the Center of  
785 Its Distribution Range." *Ecosystems* 20(8):1494–1511.
- 786 Kramer, Koen et al. 2010. "Modelling Exploration of the Future of European Beech (*Fagus Sylvatica*  
787 L.) under Climate Change-Range, Abundance, Genetic Diversity and Adaptive Response."  
788 *Forest Ecology and Management* 259(11):2213–22.
- 789 Lebourgeois, F., N. Bréda, E. Ulrich, and A. Granier. 2005. "Climate-Tree-Growth Relationships of  
790 European Beech (*Fagus Sylvatica* L.) in the French Permanent Plot Network (RENECOFOR)."  
791 *Trees* 19:385–401.
- 792 Lederer, D. J., S. C. Bell et al., Control of Confounding and Reporting of Results in Causal Inference  
793 Studies. Guidance for Authors from Editors of Respiratory, Sleep, and Critical Care Journals.  
794 *Ann Am Thorac Soc* 16 (2019), S. 22-28.
- 795 Lenz, Armando, Günter Hoch, Yann Vitasse, and Christian Körner. 2013. "European Deciduous  
796 Trees Exhibit Similar Safety Margins against Damage by Spring Freeze Events along  
797 Elevational Gradients." *New Phytologist* 200(4):1166–75.
- 798 Lines, Emily R., David A. Coomes, and Drew W. Purves. 2010. "Influences of Forest Structure,  
799 Climate and Species Composition on Tree Mortality across the Eastern US" edited by A.  
800 Hector. *PLoS ONE* 5(10):e13212.
- 801 Long, Jacob A. 2018. "Jtools: Analysis and Presentation of Social Scientific Data."
- 802 Lorenz, Martin and Georg Becher. 2012. *Forest Condition in Europe*.
- 803 Loustau, D., A. Granier, F. El Hadj Moussa, M. Sartore, and M. Guedon. 1990. "Evolution  
804 Saisonnière Du Flux de Sève Dans Un Peuplement de Pins Maritimes." *Annales Des Sciences*  
805 *Forestières* 47(6):599–618.

- 806 Van Mantgem, Phillip J. et al. 2009. "Widespread Increase of Tree Mortality Rates in the Western  
807 United States." *Science* 323(5913):521–24.
- 808 Maraun, Mark, Jörg-Alfred Salamon, Katja Schneider, Matthias Schaefer, and Stefan Scheu. 2003.  
809 "Oribatid Mite and Collembolan Diversity, Density and Community Structure in a Moder  
810 Beech Forest (*Fagus Sylvatica*): Effects of Mechanical Perturbations." *Soil Biology and*  
811 *Biochemistry* 35(10):1387–94.
- 812 Martin, George L. and Alan R. Ek. 1984. "A Comparison of Competition Measures and Growth  
813 Models for Predicting Plantation Red Pine Diameter and Height Growth." *Forest Science*  
814 30(3):731–43.
- 815 McDowell, Nate G. et al. 2013. "Evaluating Theories of Drought-Induced Vegetation Mortality  
816 Using a Multimodel-Experiment Framework." *New Phytologist* 200(2):304–21.
- 817 McDowell, Nate G. et al. 2011. "The Interdependence of Mechanisms Underlying Climate-Driven  
818 Vegetation Mortality." *Trends in Ecology & Evolution* 26(10):523–32.
- 819 Meir, Patrick, Maurizio Mencuccini, and Roderick C. Dewar. 2015. "Drought-Related Tree  
820 Mortality: Addressing the Gaps in Understanding and Prediction." *New Phytologist*  
821 207(1):1443–47.
- 822 Menzel, Annette, Raimund Helm, and Christian Zang. 2015. "Patterns of Late Spring Frost Leaf  
823 Damage and Recovery in a European Beech (*Fagus Sylvatica* L.) Stand in South-Eastern  
824 Germany Based on Repeated Digital Photographs." *Frontiers in Plant Science* 6:110.
- 825 Monserud, Robert A. 1976. "Simulation of Forest Tree Mortality." *Forest Science* 22(4):438–44.
- 826 Monteith, J. L. 1965. "Evaporation and Environment. The State and Movement of Water in Living  
827 Organisms. Symposium of the Society of Experimental Biology, Vol. 19 (Pp. 205–234)."
- 828 Mueller, Rebecca C. et al. 2005. "Differential Tree Mortality in Response to Severe Drought:  
829 Evidence for Long-Term Vegetation Shifts." *Journal of Ecology* 93(6):1085–93.
- 830 Niinemets, Ülo. 2010. "Responses of Forest Trees to Single and Multiple Environmental Stresses  
831 from Seedlings to Mature Plants: Past Stress History, Stress Interactions, Tolerance and  
832 Acclimation." *Forest Ecology and Management* 260(10):1623–39.
- 833 Nourtier, Marie et al. 2014. "Transpiration of Silver Fir (*Abies Alba* Mill.) during and after Drought  
834 in Relation to Soil Properties in a Mediterranean Mountain Area." *Annals of Forest Science*  
835 71(6):683–95.
- 836 O'Brien, Michael J. et al. 2017. "A Synthesis of Tree Functional Traits Related to Drought-Induced  
837 Mortality in Forests across Climatic Zones. *Journal of Applied Ecology* 54(6):1669–86.
- 838 O'Brien, Michael J., Sebastian Leuzinger, Christopher D. Philipson, John Tay, and Andy Hector.  
839 2014. "Drought Survival of Tropical Tree Seedlings Enhanced by Non-Structural Carbohydrate  
840 Levels." *Nature Climate Change* 4(8):710–14.
- 841 Pammenter NW and Vander Willigen C. 1998. "A Mathematical and Statistical Analysis of the  
842 Curves Illustrating Vulnerability of Xylem to Cavitation." *Tree Physiology* 18(Equation 1):589–  
843 593.
- 844 Penuelas, Josep and Martí Boada. 2003. "A Global Change-Induced Biome Shift in the Montseny  
845 Mountains (NE Spain)." *Global Change Biology* 9(2):131–40.
- 846 Perci du Sert, Th. 1982. *Relations Entre La Phenologie et La Morphologie Du Hêtre Dans Le Massif*  
847 *Des Albères*.
- 848 Pretzsch, Hans. 1996. "Growth Trends of Forests in Southern Germany." Pp. 107–31 in *Growth*  
849 *Trends in European Forests*. Berlin, Heidelberg: Springer Berlin Heidelberg.
- 850 Robson, T. Matthew, Erwin Rasztovits, Pedro J. Aphalo, Ricardo Alia, and Ismael Aranda. 2013.  
851 "Flushing Phenology and Fitness of European Beech (*Fagus Sylvatica* L.) Provenances from a

- 852 Trial in La Rioja, Spain, Segregate According to Their Climate of Origin." *Agricultural and*  
853 *Forest Meteorology* 180:76–85.
- 854 Ryan, Michael G. 1991. "Effects of Climate Change on Plant Respiration." *Ecological Applications*  
855 1(2):157–67.
- 856 Sala, A. and J. D. Tenhunen. 1996. "Simulations of Canopy Net Photosynthesis and Transpiration in  
857 *Quercus Ilex L.* under the Influence of Seasonal Drought." *Agricultural and Forest*  
858 *Meteorology* 78(3–4):203–22.
- 859 Schielzeth, Holger. 2010. "Simple Means to Improve the Interpretability of Regression  
860 Coefficients." *Methods in Ecology and Evolution* 1(2):103–13.
- 861 Seidl, Rupert et al. 2011. "Modelling Natural Disturbances in Forest Ecosystems: A Review." *Ecological Modelling* 222(4):903–24.
- 862 Senf, Cornelius et al. 2018. "Canopy Mortality Has Doubled in Europe's Temperate Forests over  
863 the Last Three Decades." *Nature Communications* 9(1):4978.
- 864 Sevanto, Sanna, Nate G. McDowell, L. Turin Dickman, Robert Pangle, and William T. Pockman.  
865 2014. "How Do Trees Die? A Test of the Hydraulic Failure and Carbon Starvation  
866 Hypotheses." *Plant, Cell and Environment* 37(1):153–61.
- 867 Stadt, Kenneth J. et al. 2007. "Evaluation of Competition and Light Estimation Indices for  
868 Predicting Diameter Growth in Mature Boreal Mixed Forests." *Annals of Forest Science*  
869 64(64):477–90.
- 870 Thuiller, Wilfried, Sandra Lavorel, M. B. Araujo, Martin T. Sykes, and I. Colin Prentice. 2005.  
871 "Climate Change Threats to Plant Diversity in Europe." *Proceedings of the National Academy*  
872 *of Sciences* 102(23):8245–50.
- 873 Tyree, M. T. and J. S. Sperry. 1989. "Vulnerability of Xylem to Cavitation and Embolism." *Annual*  
874 *Review of Plant Physiology and Plant Molecular Biology* 40(1):19–36.
- 875 Vanoni, Marco, Harald Bugmann, Magdalena Nötzli, and Christof Bigler. 2016. "Drought and Frost  
876 Contribute to Abrupt Growth Decreases before Tree Mortality in Nine Temperate Tree  
877 Species." *Forest Ecology and Management Journal* 382:51–63.
- 878 Vidal, Jean-Philippe, Eric Martin, Laurent Franchistéguy, Martine Baillon, and Jean-Michel  
879 Soubeyroux. 2010. "A 50-Year High-Resolution Atmospheric Reanalysis over France with the  
880 Safran System." *International Journal of Climatology* 30(11):1627–44.
- 881 Vitasse, Yann et al. 2009. "Leaf Phenology Sensitivity to Temperature in European Trees: Do  
882 within-Species Populations Exhibit Similar Responses?" *Agricultural and Forest Meteorology*  
883 149(5):735–44.
- 884 De Vries, F. W. T. Pennin., A. H. M. Brunsting, and H. H. Van Laar. 1974. "Products, Requirements  
885 and Efficiency of Biosynthesis a Quantitative Approach." *Journal of Theoretical Biology*  
886 45(2):339–77.
- 887  
888

## 889 Appendices

890 Four supplementary appendices are available on bioRxiv (645747):

891 Appendix 1: CASTANEA model, calibration and simulation design

892 Appendix 2: Beta-regression model for the temporal variations in the rate of mortality in the studied  
893 population

894 Appendix 3: Logistic regression models for the probability of mortality at tree-level

895 Appendix 4: Survival analysis the probability of mortality at tree- and year-levels
